# Supplementary material for: Genetic Variability of Bovine Leukemia Virus: Evidence of Dual Infection, Recombination and Quasi-Species
Source: Pathogens. 2024 Feb 15;13(2):178. doi: 10.3390/pathogens13020178 (PMC10893129; doi:10.3390/pathogens13020178)
Supplement: Supplementary file 1 [file pathogens-13-00178-s001.zip]

Archive with 4 entries (4 files):
- Supplementary Figure S6.jpg
- Supplementary Figure S7.jpg
- Supplementary Figure S9.jpg
- Supplementary materials.pdf
